# Supplementary material for: Lifestyle of a Roman Imperial community: ethnobotanical evidence from dental calculus of the Ager Curensis inhabitants
Source: PubMed Central journal article supplement (PMC6894264; doi:10.1186/s13002-019-0334-z), 2019-12-04
Supplement: 13002_2019_334_MOESM1_ESM.pdf [file 13002_2019_334_MOESM1_ESM.pdf]

## Supplemental Material 1

| Burial | Starch granules | Indeterminate particle | Pollen grains with airsacs | Fungal spores/hyphae | Indeterminate Phytoliths | Calcium oxalate |
|--------|-----------------|------------------------|----------------------------|----------------------|--------------------------|-----------------|
| 3      |                 | 1                      | 2                          |                      |                          |                 |
| 8      |                 |                        |                            | 7                    | 2                        |                 |
| 12     | 1               | 6                      |                            |                      |                          | 3               |
| 17     |                 |                        |                            | 1                    |                          |                 |
| 24     | 13              |                        | 1                          |                      |                          |                 |
| 25     |                 | 3                      |                            | 2                    |                          | 1               |
| 34     |                 | 1                      |                            | 4                    |                          |                 |
| 40     |                 | 5                      |                            |                      | 1                        |                 |
