# Supplementary material for: Lifestyle of a Roman Imperial community: ethnobotanical evidence from dental calculus of the Ager Curensis inhabitants
Source: PubMed Central journal article supplement (PMC6894264; doi:10.1186/s13002-019-0334-z), 2019-12-04
Supplement: 13002_2019_334_MOESM2_ESM.pdf [file 13002_2019_334_MOESM2_ESM.pdf]

## Supplemental Material 2– D’Agostino et al.

| Burial 1                           |                                |                                                                                                                                           |
|------------------------------------|--------------------------------|-------------------------------------------------------------------------------------------------------------------------------------------|
| Sugars                             |                                | Mannose<br>Lactose                                                                                                                        |
| Amino acids                        |                                | Serine                                                                                                                                    |
| Fatty acids                        | Saturated                      | Butanoic acid<br>Pentanoic acid<br>Tridecanoic acid<br>Hexadecanoic acid<br>Heneicosanoic acid<br>Octacosanoic acid<br>Triacontanoic acid |
|                                    | Unsaturated                    | 11-Octadecenoic acid                                                                                                                      |
| Alcohols                           |                                | 1-Decanol<br>6-Tridecanol<br>1-Dodecanol<br>11-Methyldodecanol                                                                            |
| Terpens and terpenoids             | Monoterpenes and derivatives   | Linalool<br>Citronellol, dihydro                                                                                                          |
|                                    | Sesquiterpenes and derivatives | Nerolidol, hexahydro                                                                                                                      |
| Phenolic compounds and derivatives |                                | 2,6-Dihydroxybenzoic acid<br>1,2-Benzenediol<br>Resorcinol                                                                                |
| Other markers                      |                                | Octanal                                                                                                                                   |

| Burial 2               |                              |                                                                                                    |         |                                   |
|------------------------|------------------------------|----------------------------------------------------------------------------------------------------|---------|-----------------------------------|
| Amino acids            |                              | Serine                                                                                             |         |                                   |
| Fatty acids            | Saturated                    | Hexanoic acid<br>Hexadecanoic acid<br>Tricosanoic acid<br>Pentacosanoic acid<br>Triacontanoic acid |         |                                   |
|                        |                              | Unsaturated                                                                                        | omega-3 | Docosa-2,6,10,14,18-pentaen-22-al |
|                        |                              |                                                                                                    | omega-6 | 9,12-Octadecadienoic acid         |
|                        |                              |                                                                                                    | omega-7 | 11-Octadecenoic acid              |
|                        |                              |                                                                                                    | omega-9 | 9-Octadecenoic acid               |
| Alcohols               |                              | Tridecan-1-ol<br>1-Dodecanol<br>11-Methyldodecanol                                                 |         |                                   |
| Terpens and terpenoids | Monoterpenes and derivatives | Pinene                                                                                             |         |                                   |
|                        | Triterpenoids                | Tigogenin<br>Tetrahydrosmilagenin                                                                  |         |                                   |

| Burial 3 |           |
|----------|-----------|
| Sugars   | Galactose |

|                        |                              |                                                                                            |
|------------------------|------------------------------|--------------------------------------------------------------------------------------------|
| Amino acids            |                              | Serine                                                                                     |
| Fatty acids            | Saturated                    | Hexadecanoic acid<br>Triacontanoic acid                                                    |
|                        |                              | Unsaturated                                                                                |
|                        |                              | omega-9<br>9-Octadecenoic acid                                                             |
| Alcohols               |                              | 1-Octanol<br>1-Decanol<br>6-Tridecanol<br>1-Undecanol<br>1-Dodecanol<br>11-Methyldodecanol |
| Terpens and terpenoids | Monoterpenes and derivatives | Terpinen-4-ol                                                                              |

| Burial 4                        |                                |                                                                                                                        |                                 |
|---------------------------------|--------------------------------|------------------------------------------------------------------------------------------------------------------------|---------------------------------|
| Amino acids                     |                                | Serine                                                                                                                 |                                 |
| Fatty acids                     | Saturated                      | Tridecanoic acid<br>Hexadecanoic acid<br>Octadecanoic acid<br>Dodecanoic acid<br>Docosanoic acid<br>Triacontanoic acid |                                 |
|                                 |                                | Unsaturated                                                                                                            | omega-3<br>Doconexent           |
|                                 |                                |                                                                                                                        | omega-7<br>11-Octadecenoic acid |
| omega-12<br>6-Octadecenoic acid |                                |                                                                                                                        |                                 |
| Alcohols                        |                                | 1-Dodecanol<br>9-Octadecen-1-ol                                                                                        |                                 |
| Terpens and terpenoids          | Sesquiterpenes and derivatives | Santalol                                                                                                               |                                 |

| Burial 6    |           |                                                                                                                                                                                                             |                                                                                                                     |
|-------------|-----------|-------------------------------------------------------------------------------------------------------------------------------------------------------------------------------------------------------------|---------------------------------------------------------------------------------------------------------------------|
| Fatty acids | Saturated | Pentanoic acid<br>Tridecanoic acid<br>Tetradecanoic acid<br>Hexadecanoic acid<br>Octadecanoic acid<br>Heneicosanoic acid<br>Docosanoic acid<br>Hexacosanoic acid<br>Octacosanoic acid<br>Triacontanoic acid |                                                                                                                     |
|             |           | Unsaturated                                                                                                                                                                                                 | omega-3<br>2,6,10,14,18-Pentamethyl-2,6,10,14,18-eicosapentaene<br>5,8,11,14,17-Eicosapentaenoic acid<br>Doconexent |
|             |           |                                                                                                                                                                                                             | omega-6<br>9,12-Octadecadienoic acid                                                                                |
|             |           |                                                                                                                                                                                                             | omega-7<br>9-Hexadecenoic acid<br>11-Octadecenoic acid                                                              |
|             |           |                                                                                                                                                                                                             | omega-9<br>9-Octadecenoic acid<br>13-Docosenoic acid                                                                |

|                                    |                                |          |                                                                                                 |
|------------------------------------|--------------------------------|----------|-------------------------------------------------------------------------------------------------|
|                                    |                                |          | 15-Tetracosenoic acid                                                                           |
|                                    |                                | omega-12 | 6-Octadecenoic acid                                                                             |
| Alcohols                           |                                |          | 1-Dodecanol<br>3-Dodecanol<br>Tetracosanol-1<br>Octacosanol                                     |
| Terpens and terpenoids             | Monoterpenes and derivatives   |          | 1,2-Dihydrolinalool                                                                             |
|                                    | Sesquiterpenes and derivatives |          | Globulol<br>Epicubebol<br>Azulene, 2,3,3a,4,7,8-hexahydro<br>Azulene, 1,2,3,4,5,6,7,8-octahydro |
| Phenolic compounds and derivatives |                                |          | Scopoletin                                                                                      |
| Other markers                      |                                |          | Tartaric acid<br>Pyrogallol                                                                     |

| <b>Burial 8</b>        |                                |         |                                                                                  |
|------------------------|--------------------------------|---------|----------------------------------------------------------------------------------|
| Amino acids            |                                |         | Lysine                                                                           |
| Fatty acids            | Saturated                      |         | Butanoic acid<br>Tridecanoic acid<br>Hexadecanoic acid<br>Triacontanoic acid     |
|                        | Unsaturated                    | omega-3 | Docosa-2,6,10,14,18-pentaen-22-al<br>5,8,11,14-Eicosatetraenoic acid             |
|                        |                                | omega-7 | 11-Octadecenoic acid                                                             |
| Alcohols               |                                |         | 1-Decanol<br>1-Dodecanol<br>9-Octadecen-1-ol                                     |
| Terpens and terpenoids | Monoterpenes and derivatives   |         | Citronellol<br>Ocimene                                                           |
|                        | Sesquiterpenes and derivatives |         | Shyobunol                                                                        |
| Other markers          |                                |         | Vitamin E<br>Isothiocyanic acid<br>2-Decenal<br>7-Hexadecenal<br>15-Heptadecenal |

| <b>Burial 9</b>        |                              |  |                                                |
|------------------------|------------------------------|--|------------------------------------------------|
| Sugars                 |                              |  | Lactose                                        |
| Amino acids            |                              |  | Serine                                         |
| Fatty acids            | Saturated                    |  | Tridecanoic acid<br>Hexadecanoic acid          |
|                        | Unsaturated                  |  | 9-Octadecenoic acid                            |
| Alcohols               |                              |  | 1-Octanol<br>1-Dodecanol<br>11-Methyldodecanol |
| Terpens and terpenoids | Monoterpenes and derivatives |  | Levomenthol<br>Ocimene                         |

| Burial 10              |                              |                                                                                                                     |                     |
|------------------------|------------------------------|---------------------------------------------------------------------------------------------------------------------|---------------------|
| Amino acids            |                              | Serine                                                                                                              |                     |
| Fatty acids            | Saturated                    | Butanoic acid<br>Tridecanoic acid<br>Hexadecanoic acid<br>Octadecanoic acid<br>Dodecanoic acid<br>Octacosanoic acid |                     |
|                        |                              | Unsaturated                                                                                                         | omega-7             |
|                        |                              | omega-9                                                                                                             | 9-Octadecenoic acid |
| Alcohols               |                              | 1-Octanol<br>1-Nonanol<br>1-Decanol<br>1-Dodecanol<br>11-Methyldodecanol<br>11-Tetradecen-1-ol                      |                     |
| Terpens and terpenoids | Monoterpenes and derivatives | Citronellol                                                                                                         |                     |

| Burial 11                          |                              |                                                                                                                     |                      |
|------------------------------------|------------------------------|---------------------------------------------------------------------------------------------------------------------|----------------------|
| Amino acids                        |                              | Serine                                                                                                              |                      |
| Fatty acids                        | Saturated                    | Octadecanoic acid<br>Nonanoic acid<br>Dodecanoic acid<br>Hexadecanoic acid<br>Docosanoic acid<br>Triacontanoic acid |                      |
|                                    |                              | Unsaturated                                                                                                         | omega-3              |
|                                    |                              | omega-7                                                                                                             | 11-Octadecenoic acid |
| Alcohols                           |                              | 1-Decanol<br>1-Dodecanol<br>9-Octadecen-1-ol<br>1-Heptacosanol                                                      |                      |
| Terpens and terpenoids             | Monoterpenes and derivatives | Menthol<br>Levomenthol<br>Citronellol<br>Pennogenin                                                                 |                      |
| Phenolic compounds and derivatives |                              | Phytol                                                                                                              |                      |

| Burial 12   |             |                                                                             |
|-------------|-------------|-----------------------------------------------------------------------------|
| Amino acids |             | Serine                                                                      |
| Fatty acids | Saturated   | Butanoic acid<br>Tridecanoic acid<br>Hexadecanoic acid<br>Octadecanoic acid |
|             | Unsaturated | 9,12-Octadecadienoic acid                                                   |

|                        |                              |                                                                    |
|------------------------|------------------------------|--------------------------------------------------------------------|
| Alcohols               |                              | 11-Methyldodecanol<br>1-Decanol<br>1-Dodecanol<br>9-Octadecen-1-ol |
| Terpens and terpenoids | Monoterpenes and derivatives | Citronellol                                                        |

| Burial 14                 |                              |                                                                   |
|---------------------------|------------------------------|-------------------------------------------------------------------|
| Sugars                    |                              | Lactose<br>Galactitol                                             |
| Amino acids               |                              | Serine                                                            |
| Fatty acids               | Saturated                    | Tridecanoic acid<br>Hexadecanoic acid<br>Octadecanoic acid        |
|                           | Unsaturated                  | 11-Octadecenoic acid                                              |
| Alcohols                  |                              | 1-Heptanol<br>1-Dodecanol<br>11-Methyldodecanol<br>Tetracosanol-1 |
| Terpens and terpenoids    | Monoterpenes and derivatives | 3-Carene                                                          |
| Alkaloids and derivatives |                              | Papaveroline                                                      |
| Other markers             |                              | Hexadecanal                                                       |

| Burial 17                 |           |                                                                                                                                                                  |                                           |
|---------------------------|-----------|------------------------------------------------------------------------------------------------------------------------------------------------------------------|-------------------------------------------|
| Sugars                    |           | Inositol                                                                                                                                                         |                                           |
| Amino acids               |           | Lysine<br>Serine                                                                                                                                                 |                                           |
| Fatty acids               | Saturated | Butanoic acid<br>Dodecanoic acid<br>Tridecanoic acid<br>Hexadecanoic acid<br>Heptacosanoic acid<br>Octadecanoic acid<br>Heneicosanoic acid<br>Triacontanoic acid |                                           |
|                           |           | Unsaturated                                                                                                                                                      | omega-3                                   |
|                           | omega-7   |                                                                                                                                                                  | 11-Octadecenoic acid                      |
|                           | omega-9   |                                                                                                                                                                  | 9-Hexadecenoic acid<br>13-Docosenoic acid |
| Alcohols                  |           | 1-Heptanol<br>1-Decanol<br>11-Methyldodecanol<br>1-Dodecen-3-ol<br>11-Tetradecen-1-ol                                                                            |                                           |
| Alkaloids and derivatives |           | Ergosine                                                                                                                                                         |                                           |
| Other markers             |           | Thiocyanic acid<br>Isothiocyanate<br>2-Dodecenal                                                                                                                 |                                           |

| Burial 21              |                              |                                                           |
|------------------------|------------------------------|-----------------------------------------------------------|
| Fatty acids            | Saturated                    | Hexadecanoic acid<br>Octadecanoic acid<br>Dodecanoic acid |
| Alcohols               |                              | 1-Decanol<br>6-Tridecanol<br>11-Methyldodecanol           |
| Terpens and terpenoids | Monoterpenes and derivatives | 3-Carene                                                  |
| Other markers          |                              | 7-Hexadecenal                                             |

| Burial 23                 |           |                                                                               |
|---------------------------|-----------|-------------------------------------------------------------------------------|
| Sugars                    |           | Glucopyranose, 1,6-anhydro-                                                   |
| Fatty acids               | Saturated | Pentanoic acid<br>Hexadecanoic acid<br>Octadecanoic acid<br>Triacotanoic acid |
| Alcohols                  |           | 1-Decanol                                                                     |
| Alkaloids and derivatives |           | Digitoxin                                                                     |

| Burial 24                          |                                |                                                           |
|------------------------------------|--------------------------------|-----------------------------------------------------------|
| Fatty acids                        | Saturated                      | Dodecanoic acid<br>Hexadecanoic acid<br>Octadecanoic acid |
| Alcohols                           |                                | 1-Dodecanol<br>11-Methyldodecanol<br>Eicosen-1-ol         |
| Terpens and terpenoids             | Sesquiterpenes and derivatives | Humulol                                                   |
| Phenolic compounds and derivatives |                                | Resorcinol                                                |
| Other markers                      |                                | 2-Decenal                                                 |

| Burial 25   |             |                                                                                      |                                   |
|-------------|-------------|--------------------------------------------------------------------------------------|-----------------------------------|
| Sugars      |             | Fucose<br>Sucrose                                                                    |                                   |
| Amino acids |             | Serine                                                                               |                                   |
| Fatty acids | Saturated   | Tridecanoic acid<br>Hexadecanoic acid                                                |                                   |
|             | Unsaturated | omega-3                                                                              | Docosa-2,6,10,14,18-pentaen-22-al |
|             |             | omega-9                                                                              | 9-Octadecenoic acid               |
| Alcohols    |             | 1-Decanol<br>1-Dodecanol<br>11-Methyldodecanol<br>1-Tetradecanol<br>9-Octadecen-1-ol |                                   |

|                        |                              |                    |
|------------------------|------------------------------|--------------------|
| Terpens and terpenoids | Monoterpenes and derivatives | Citronellol        |
| Other markers          |                              | Isothiocyanic acid |

| Burial 26   |                      |                           |
|-------------|----------------------|---------------------------|
| Fatty acids | Saturated            | Hexadecanoic acid         |
|             |                      | Heptacosanoic acid        |
|             |                      | Octadecanoic acid         |
|             |                      | Heneicosanoic acid        |
|             | Docosanoic acid      |                           |
|             | Tricontanoic acid    |                           |
| Fatty acids | Unsaturated          | omega-6                   |
|             |                      | 9,12-Octadecadienoic acid |
|             |                      | omega-7                   |
|             | 11-Octadecenoic acid |                           |
|             | omega-9              |                           |
|             | 9-Octadecenoic acid  |                           |
| Alcohols    |                      | 1-Decanol                 |
|             |                      | 11-Methyldodecanol        |
|             |                      | Tetracosanol-1            |

| Burial 27   |                     |                                   |
|-------------|---------------------|-----------------------------------|
| Amino acids |                     | Serine                            |
| Fatty acids | Saturated           | Pentanoic acid                    |
|             |                     | Dodecanoic acid                   |
|             |                     | Hexadecanoic acid                 |
|             |                     | Docosanoic acid                   |
|             | Tricontanoic acid   |                                   |
| Fatty acids | Unsaturated         | omega-3                           |
|             |                     | Docosa-2,6,10,14,18-pentaen-22-al |
|             | omega-9             |                                   |
|             | 9-Octadecenoic acid |                                   |
| Alcohols    |                     | 1-Hexanol                         |
|             |                     | 1-Decanol                         |
|             |                     | 2-Undecen-1-ol                    |
|             |                     | 1-Heptacosanol                    |

| Burial 28   |                   |                     |
|-------------|-------------------|---------------------|
| Amino acids |                   | Alanine             |
|             |                   | Lysine              |
|             |                   | Serine              |
| Fatty acids | Saturated         | Butanoic acid       |
|             |                   | Hexadecanoic acid   |
|             |                   | Octadecanoic acid   |
|             | Tricontanoic acid |                     |
|             | Unsaturated       | 9-Octadecenoic acid |
| Alcohols    |                   | 1-Hexanol           |
|             |                   | 1-Heptanol          |
|             |                   | 1-Octanol           |
|             |                   | 2-Nonen-1-ol        |
|             |                   | 1-Dodecanol         |
|             |                   | 11-Methyldodecanol  |

|                           |                                                                                    |
|---------------------------|------------------------------------------------------------------------------------|
| Alkaloids and derivatives | 1H-Isoindole-5-carboxylic acid, 2,3-dihydro-1,3-dioxo<br>1H-Indole<br>4-Piperidone |
| Other markers             | 2-Dodecenal<br>Decanal<br>Maltol                                                   |

| Burial 29                          |                              |                                                                                |
|------------------------------------|------------------------------|--------------------------------------------------------------------------------|
| Fatty acids                        | Saturated                    | Pentanoic acid<br>Hexadecanoic acid<br>Octadecanoic acid<br>Triacontanoic acid |
|                                    | Unsaturated                  | 7-Hexadecenoic acid                                                            |
| Alcohols                           |                              | 1-Heptanol<br>1-Nonanol<br>1-Dodecanol                                         |
| Terpens and terpenoids             | Monoterpenes and derivatives | Ocimene                                                                        |
| Phenolic compounds and derivatives |                              | Pyrogallol                                                                     |
| Other markers                      |                              | Tartaric acid<br>2-Dodecenal                                                   |

| Burial 31                          |                              |                                                                                             |
|------------------------------------|------------------------------|---------------------------------------------------------------------------------------------|
| Sugars                             |                              | Glucopyranose                                                                               |
| Fatty acids                        | Saturated                    | Dodecanoic acid<br>Hexacosanoic acid<br>Hexadecanoic acid<br>Octadecanoic acid              |
|                                    | Unsaturated                  | 9-Octadecenoic acid                                                                         |
| Alcohols                           |                              | 1-Dodecanol<br>11-Methyldodecanol<br>2-Octadecen-1-ol<br>11-Tetradecen-1-ol<br>1-Tricosanol |
| Terpens and terpenoids             | Monoterpenes and derivatives | Citronellol                                                                                 |
| Phenolic compounds and derivatives |                              | 1,2-Benzenediol                                                                             |
| Other markers                      |                              | Isothiocyanic acid                                                                          |

| Burial 34   |           |                                                                                                     |
|-------------|-----------|-----------------------------------------------------------------------------------------------------|
| Sugars      |           | Melibiose<br>Lactose                                                                                |
| Amino acids |           | Serine                                                                                              |
| Fatty acids | Saturated | Dodecanoic acid<br>Tridecanoic acid<br>Hexadecanoic acid<br>Octadecanoic acid<br>Triacontanoic acid |



|                        |                                |                                                                           |
|------------------------|--------------------------------|---------------------------------------------------------------------------|
|                        | Unsaturated                    | 9-Octadecenoic acid                                                       |
| Alcohols               |                                | 1-Decanol<br>11-Methyldodecanol<br>9-Octadecen-1-ol<br>11-Tetradecen-1-ol |
| Terpens and terpenoids | Sesquiterpenes and derivatives | Sesquithujene                                                             |
| Other markers          |                                | Isothiocyanic acid                                                        |

| Burial 36              |                              |                                                                                                    |
|------------------------|------------------------------|----------------------------------------------------------------------------------------------------|
| Amino acids            |                              | Serine                                                                                             |
| Fatty acids            | Saturated                    | Butanoic acid<br>Hexanoic acid<br>3-Hydroxydecanoic acid<br>Hexadecanoic acid<br>Octadecanoic acid |
|                        | Unsaturated                  | 9-Octadecenoic acid                                                                                |
| Alcohols               |                              | 1-Heptanol<br>1-Decanol<br>Tridecanol<br>2-Dodecen-1-ol<br>1-Hexacosanol<br>Tetracosanol-1         |
| Terpens and terpenoids | Monoterpenes and derivatives | Origanene<br>Linalool                                                                              |
| Other markers          |                              | Isothiocyanic acid<br>Cymarin                                                                      |

| Burial 38   |           |                                                                 |
|-------------|-----------|-----------------------------------------------------------------|
| Fatty acids | Saturated | Hexadecanoic acid<br>Octadecanoic acid<br>Docosanoic acid       |
| Alcohols    |           | 1-Pentanol<br>1-Hexanol<br>11-Methyldodecanol<br>1,7-Octanediol |

| Burial 39              |                              |                                        |
|------------------------|------------------------------|----------------------------------------|
| Amino acids            |                              | Serine                                 |
| Fatty acids            | Saturated                    | Hexadecanoic acid<br>Octadecanoic acid |
|                        |                              | Unsaturated                            |
|                        |                              |                                        |
| Terpens and terpenoids | Monoterpenes and derivatives | Ocimene<br>Limonen-6-ol<br>Citronellol |
| Alcohols               |                              | 1-Heptacosanol                         |

|               |                                                 |
|---------------|-------------------------------------------------|
|               | 1-Dodecanol<br>1-Triacontanol<br>Tetracosanol-1 |
| Other markers | Undecanal                                       |

| Burial 40              |                              |                                                                           |
|------------------------|------------------------------|---------------------------------------------------------------------------|
| Sugars                 |                              | Lactose                                                                   |
| Amino acids            |                              | Serine                                                                    |
| Fatty acids            | Saturated                    | Butanoic acid<br>Heptanoic acid<br>Hexadecanoic acid<br>Octadecanoic acid |
|                        | Unsaturated                  | 7-Hexadecenoic acid                                                       |
| Alcohols               |                              | 1-Hexanol<br>1-Nonanol<br>Decanol<br>11-Methyldodecanol                   |
| Terpens and terpenoids | Monoterpenes and derivatives | Citronellol                                                               |
| Other markers          |                              | Thiocyanic acid                                                           |

| Burial 41              |                              |                                                                                                                                       |
|------------------------|------------------------------|---------------------------------------------------------------------------------------------------------------------------------------|
| Sugars                 |                              | Lactose                                                                                                                               |
| Amino acids            |                              | Serine                                                                                                                                |
| Fatty acids            | Saturated                    | Dodecanoic acid<br>Hexadecanoic acid<br>Octadecanoic acid<br>Cyclopentanetridecanoic acid<br>Pentacosanoic acid<br>Triacontanoic acid |
|                        |                              | Unsaturated                                                                                                                           |
|                        |                              | omega-9<br>9-Octadecenoic acid                                                                                                        |
| Alcohols               |                              | 1-Octanol<br>1-Decanol<br>1-Dodecanol<br>11-Methyldodecanol<br>11-Tetradecen-1-ol<br>9-Octadecen-1-ol                                 |
| Terpens and terpenoids | Monoterpenes and derivatives | Citronellol<br>Levomenthol                                                                                                            |
